# Supplementary figures and images for: Do the combined blood pressure effects of exercise and antihypertensive medications add up to the sum of their parts? A systematic meta-review
Source: HighWire-hosted journal article supplement (doi:10.1136/bmjsem-2020-000895), 2021-01-01

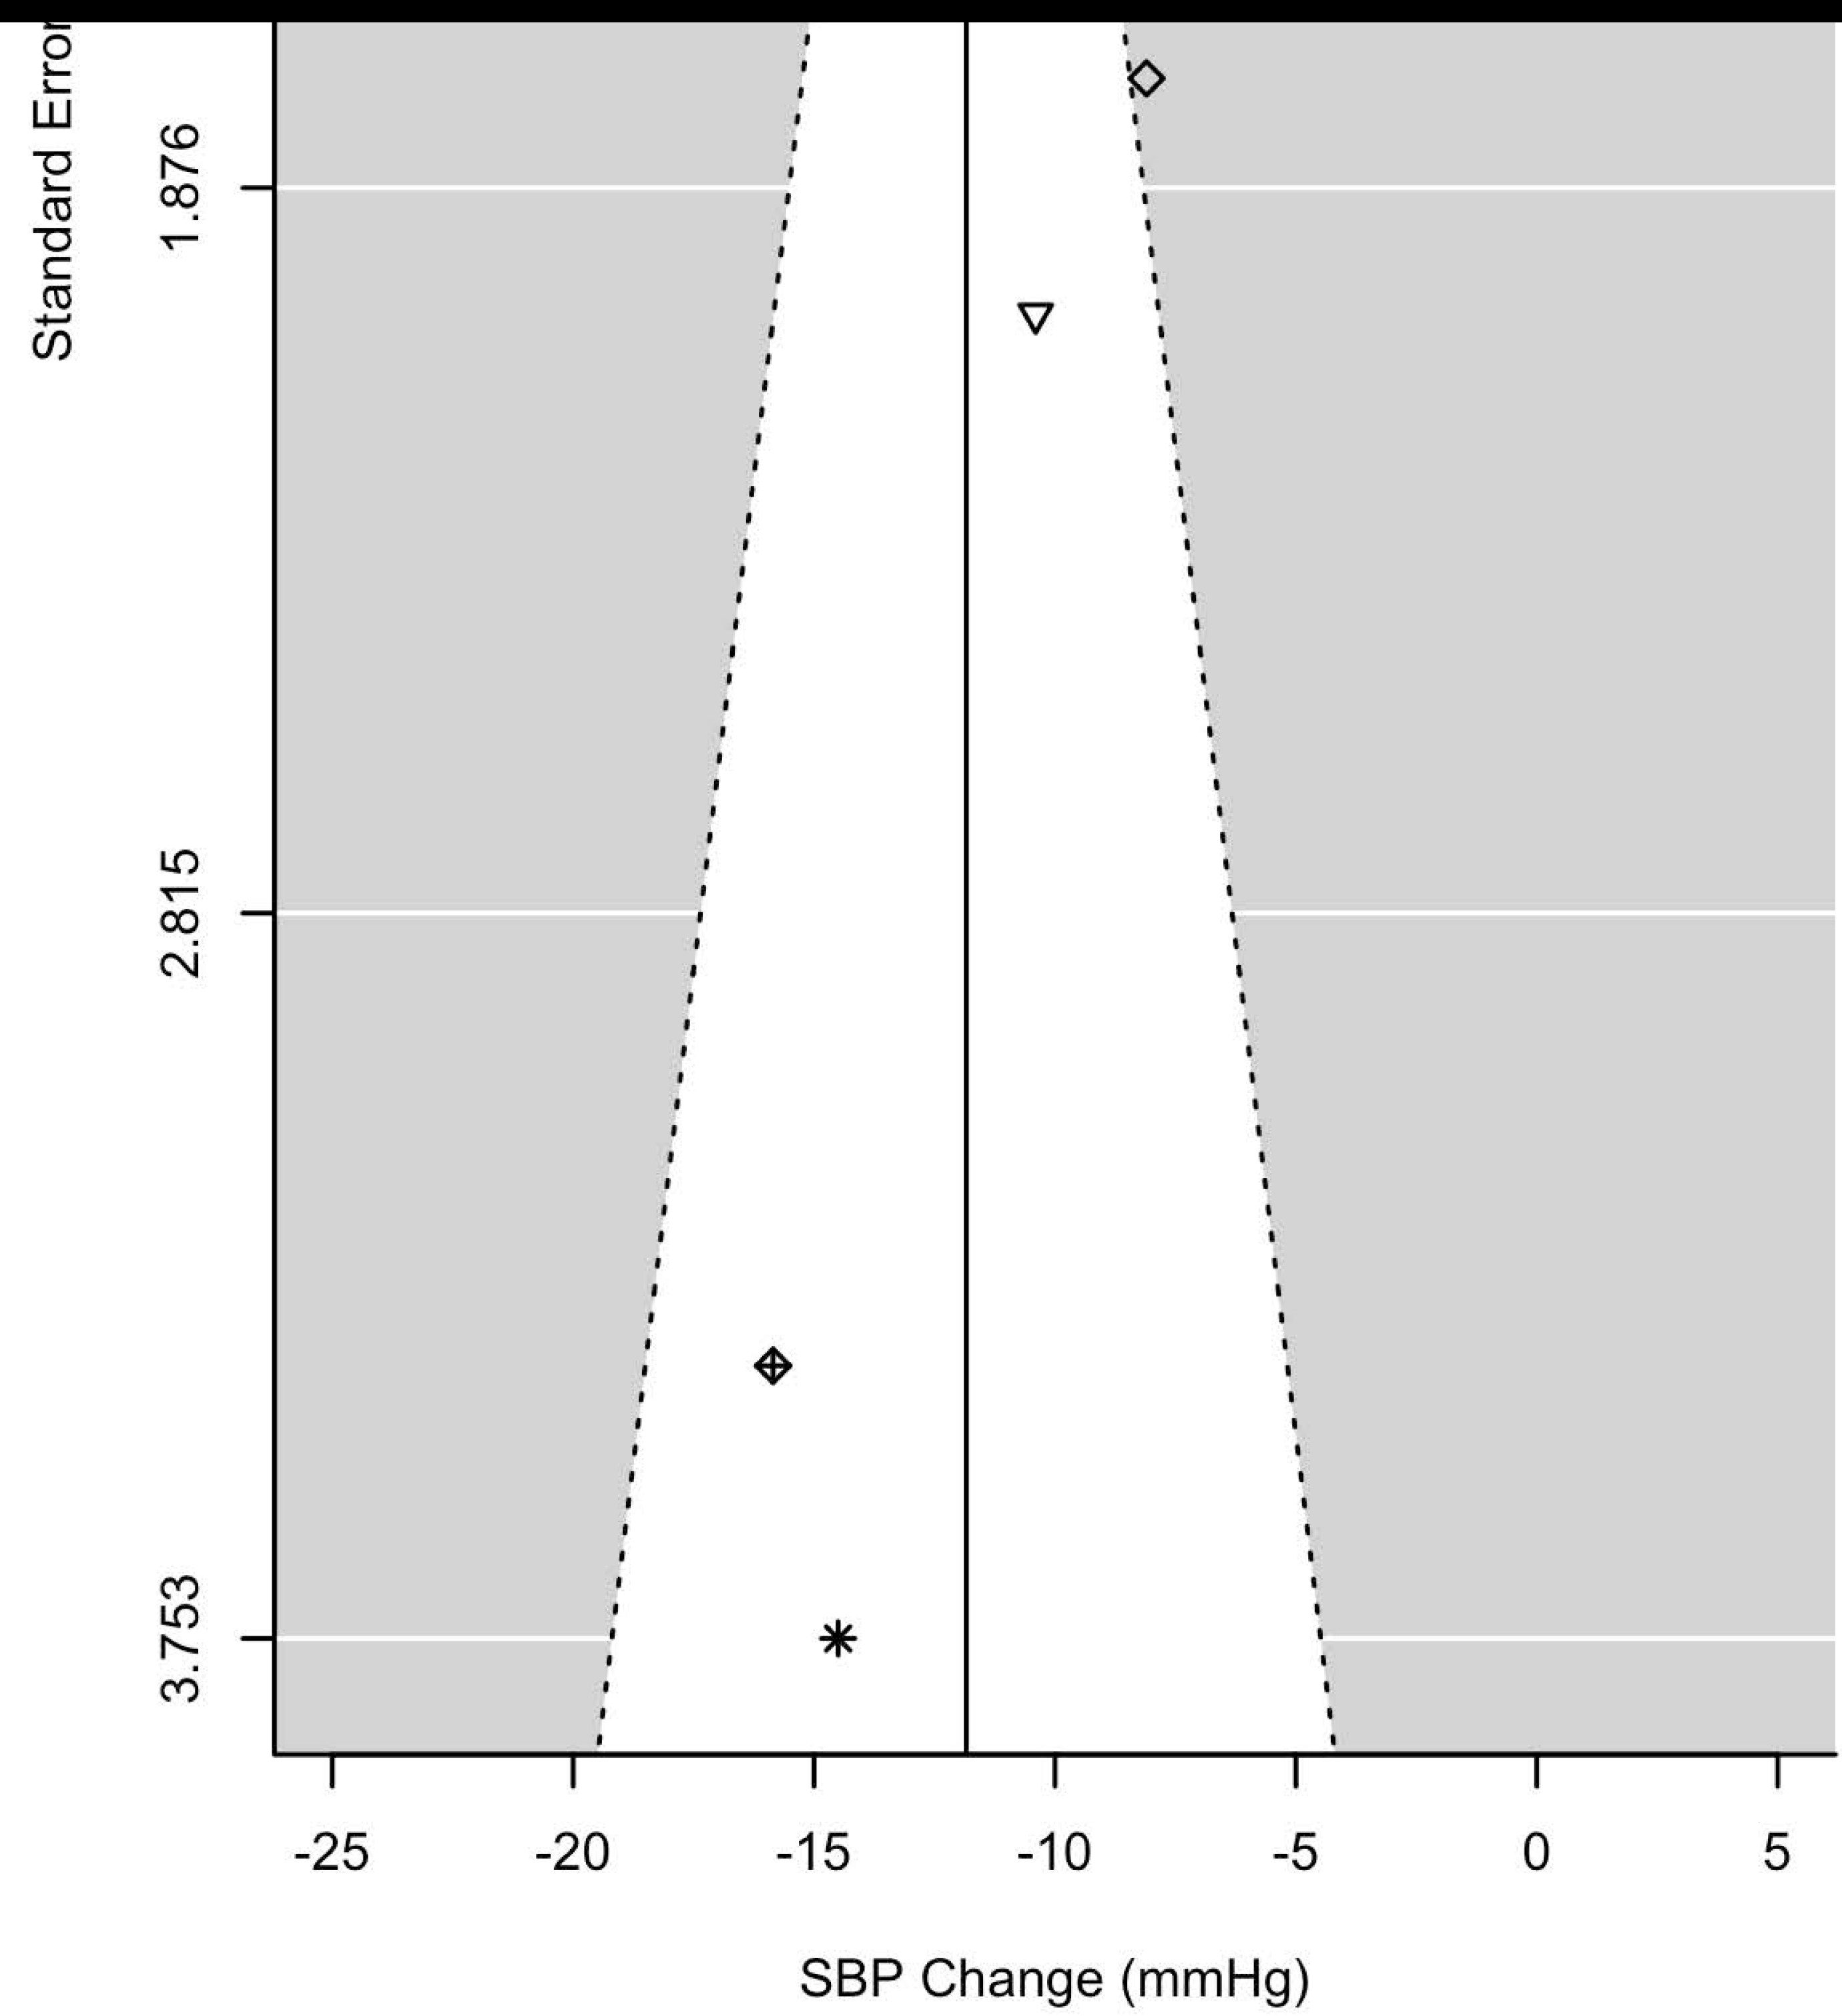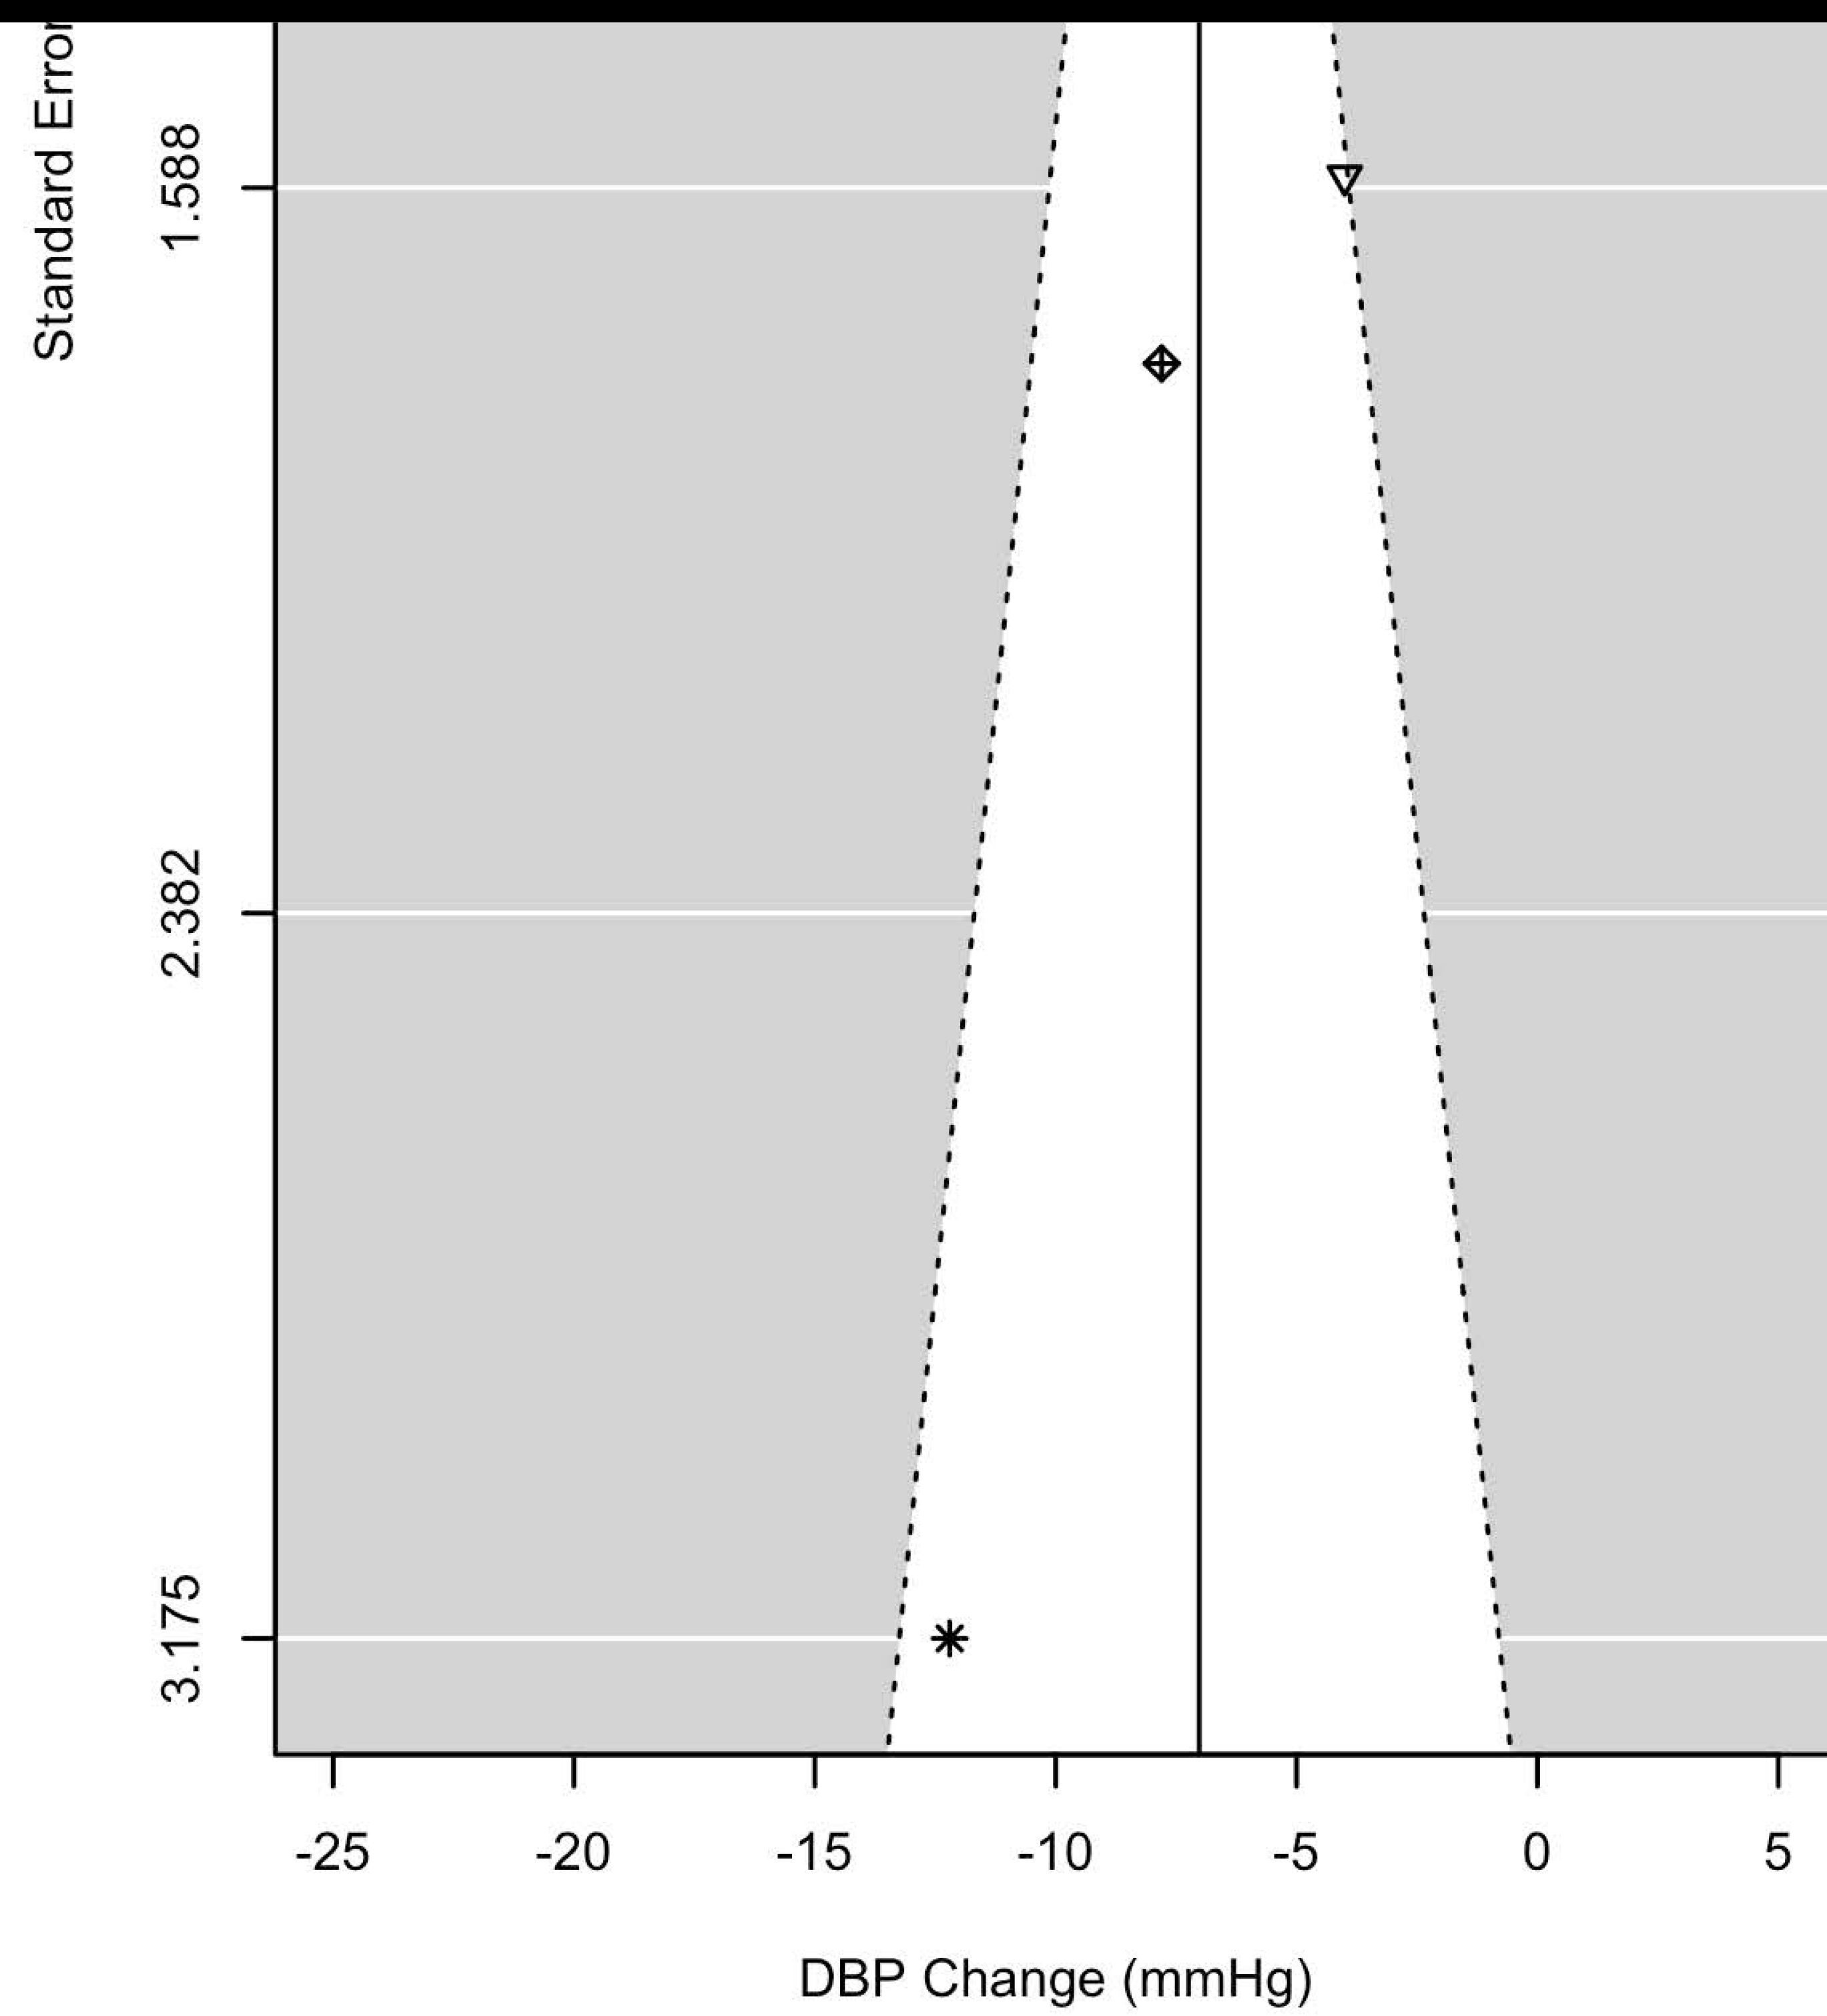

Supplement: bmjsem-2020-000895supp013_data_supplement.pdf [file bmjsem-2020-000895supp013_data_supplement.pdf]
